# Supplementary material for: Citizenship status and engagement in HIV care: an observational cohort study to assess the association between reporting a national ID number and retention in public-sector HIV care in Johannesburg, South Africa
Source: PubMed Central journal article supplement — BMJ Open. 2017 Jan 24;7(1):e013908. doi: 10.1136/bmjopen-2016-013908 (PMC5278236; doi:10.1136/bmjopen-2016-013908), 2017-01-24
Supplement: bmjopen-2016-013908supp_appendix.pdf [file bmjopen-2016-013908supp_appendix.pdf]

1 **Appendix - Unadjusted and adjusted estimates of attrition (death and loss to follow-up) at one-year**  
 2 **and ever after ART initiation among 12,219 patients who initiated antiretroviral therapy between**  
 3 **January 2008 and December 2013 at the Themba Lethu Clinic in Johannesburg, South Africa**

| Characteristic                                         | One-year after ART initiation |                         | Ever after ART initiation |                         |
|--------------------------------------------------------|-------------------------------|-------------------------|---------------------------|-------------------------|
|                                                        | Unadjusted HR<br>(95% CI)     | Adjusted HR<br>(95% CI) | Unadjusted HR<br>(95% CI) | Adjusted HR<br>(95% CI) |
| <b>Citizenship status</b>                              |                               |                         |                           |                         |
| Confirmed South African citizen                        | Reference                     | Reference               | Reference                 | Reference               |
| Unconfirmed South African citizen                      | 3.15 (2.90, 3.41)             | 2.72 (2.51, 2.95)       | 2.99 (2.80, 3.19)         | 2.70 (2.52, 2.88)       |
| Foreign national                                       | 1.02 (0.89, 1.17)             | 1.09 (0.95, 1.25)       | 0.95 (0.85, 1.05)         | 0.97 (0.87, 1.08)       |
| <b>Year of ART initiation</b>                          |                               |                         |                           |                         |
| 2008-09                                                | Reference                     | --                      | Reference                 | Reference               |
| 2010-11                                                | 0.93 (0.86, 1.02)             | --                      | 0.91 (0.85, 0.97)         | 1.11 (1.01, 1.21)       |
| 2012-13                                                | 0.94 (0.86, 1.04)             | --                      | 0.84 (0.77, 0.91)         | 1.17 (1.06, 1.30)       |
| <b>Sex</b>                                             |                               |                         |                           |                         |
| Male                                                   | 1.51 (1.40, 1.63)             | 1.44 (1.32, 1.57)       | 1.48 (1.40, 1.57)         | 1.47 (1.37, 1.57)       |
| Female                                                 | Reference                     | Reference               | Reference                 | Reference               |
| <b>Age at ART initiation</b>                           |                               |                         |                           |                         |
| <30                                                    | 1.07 (0.95, 1.20)             | 0.93 (0.83, 1.05)       | 1.27 (1.16, 1.39)         | 1.15 (1.05, 1.26)       |
| 30-34.9                                                | 0.94 (0.84, 1.05)             | 0.81 (0.72, 0.91)       | 1.10 (1.01, 1.21)         | 1.00 (0.92, 1.10)       |
| 35-39.9                                                | 0.98 (0.87, 1.09)             | 0.88 (0.78, 0.98)       | 0.98 (0.90, 1.08)         | 0.91 (0.83, 0.99)       |
| 40-44.9                                                | 0.95 (0.84, 1.07)             | 0.91 (0.80, 1.03)       | 0.95 (0.86, 1.05)         | 0.93 (0.84, 1.03)       |
| ≥45                                                    | Reference                     | Reference               | Reference                 | Reference               |
| <b>Employment status</b>                               |                               |                         |                           |                         |
| Employed                                               | Reference                     | Reference               | Reference                 | Reference               |
| Unemployed                                             | 1.59 (1.47, 1.71)             | 1.36 (1.26, 1.47)       | 1.55 (1.46, 1.64)         | 1.39 (1.30, 1.47)       |
| <b>Baseline CD4 count (cells/mm<sup>3</sup>)</b>       |                               |                         |                           |                         |
| <50                                                    | 2.89 (2.55, 3.28)             | 1.85 (1.61, 2.11)       | 2.22 (2.03, 2.44)         | 1.59 (1.44, 1.75)       |
| 50-99                                                  | 1.93 (1.68, 2.22)             | 1.39 (1.20, 1.60)       | 1.62 (1.46, 1.79)         | 1.27 (1.14, 1.42)       |
| 100-199                                                | 1.37 (1.20, 1.56)             | 1.18 (1.03, 1.35)       | 1.35 (1.23, 1.49)         | 1.23 (1.11, 1.35)       |
| ≥200                                                   | Reference                     | Reference               | Reference                 | Reference               |
| <b>BMI at ART initiation (kg/m<sup>2</sup>)</b>        |                               |                         |                           |                         |
| <18.5                                                  | 1.82 (1.64, 2.00)             | 1.31 (1.17, 1.45)       | 1.64 (1.52, 1.78)         | 1.27 (1.16, 1.38)       |
| 18.5-24.9                                              | Reference                     | Reference               | Reference                 | Reference               |
| 25-29.9                                                | 0.59 (0.51, 0.68)             | 0.79 (0.69, 0.92)       | 0.65 (0.59, 0.73)         | 0.85 (0.76, 0.95)       |
| ≥30                                                    | 0.49 (0.40, 0.60)             | 0.75 (0.60, 0.92)       | 0.56 (0.49, 0.65)         | 0.81 (0.69, 0.94)       |
| <b>WHO Stage</b>                                       |                               |                         |                           |                         |
| I/II                                                   | Reference                     | Reference               | Reference                 | Reference               |
| III/IV                                                 | 1.97 (1.82, 2.12)             | 1.24 (1.13, 1.35)       | 1.67 (1.58, 1.78)         | 1.18 (1.10, 1.27)       |
| <b>Anemia at ART initiation</b>                        |                               |                         |                           |                         |
| No Anemia                                              | Reference                     | Reference               | Reference                 | Reference               |
| Mild Anemia                                            | 1.40 (1.23, 1.60)             | 1.13 (0.98, 1.29)       | 1.22 (1.11, 1.33)         | 1.04 (0.94, 1.14)       |
| Moderate Anemia                                        | 2.04 (1.82, 2.28)             | 1.53 (1.36, 1.74)       | 1.56 (1.43, 1.69)         | 1.27 (1.16, 1.39)       |
| Severe Anemia                                          | 3.77 (3.28, 4.32)             | 2.36 (2.02, 2.75)       | 2.47 (2.22, 2.75)         | 1.74 (1.55, 1.96)       |
| <b>Co-infected with tuberculosis at ART initiation</b> |                               |                         |                           |                         |
| No                                                     | Reference                     | Reference               | Reference                 | Reference               |
| Yes                                                    | 1.54 (1.39, 1.70)             | 0.90 (0.80, 1.00)       | 1.52 (1.40, 1.65)         | 0.99 (0.90, 1.08)       |
| <b>First ART regimen<sup>λ</sup></b>                   |                               |                         |                           |                         |

|             | <b>Reference</b>  | <b>Reference</b>  | <b>Reference</b>  | <b>Reference</b>  |
|-------------|-------------------|-------------------|-------------------|-------------------|
| TDF-3TC-EFV |                   |                   |                   |                   |
| d4T-3TC-EFV | 1.15 (1.06, 1.24) | 0.90 (0.83, 0.98) | 1.20 (1.12, 1.28) | 1.06 (0.98, 1.16) |
| AZT-3TC-EFV | 1.31 (1.05, 1.65) | 1.19 (0.94, 1.50) | 1.22 (1.01, 1.48) | 1.15 (0.95, 1.41) |
| Other       | 0.80 (0.70, 0.92) | 0.91 (0.79, 1.04) | 0.94 (0.85, 1.05) | 1.02 (0.91, 1.14) |

4 <sup>λ</sup>TDF=Tenofovir; 3TC=lamivudine; EFV=efavirenz; d4T=stavudine; AZT=zidovudine; Other regimens are: TDF-3TC-NVP  
5 (nevirapine), AZT-3TC-NVP, TDF-EMT (emtricitabine)-EFV, TDF-EMT-NVP, and d4T-3TC-NVP
